# Supplementary material for: Effect of structural optimization on the photovoltaic performance of dithieno[3,2-b:2′,3′-d]pyrrole-based dye-sensitized solar cells
Source: Royal Society of Chemistry journal article supplement (doi:10.1039/c7ra05716d), 2017-01-01

## Electronic Supplementary Information

### **Effect of structural optimization on the photovoltaic performances of dithieno[3,2-*b*:2',3'-*d*]pyrrole-based dyes sensitized solar cells**

Hai Zhang<sup>a\*</sup>, Zafar Iqbal<sup>b</sup>, Zhen-E Chen<sup>a</sup>, Yan-Ping Hong<sup>c</sup>

*<sup>a</sup>School of Chemistry and Chemical Engineering, Qianbei Featured Resources Applied  
Research Key Laboratory, Zunyi Normal College, Guizhou Zunyi 563006, China.*

*Email: [haizhang@vip.sina.com](mailto:haizhang@vip.sina.com); Fax: +86 0851 28927159; Tel.: +86 0851 28927159*

*<sup>b</sup>Applied Chemistry Research Centre, PCSIR Laboratories Complex, Feroze pur Road  
Lahore 54000, Pakistan*

*<sup>c</sup>Jiangxi Key Laboratory of Natural Product and Functional Food, College of Food  
Science and Engineering, Jiangxi Agricultural University, Nanchang 330045, China*

**NMR data:**

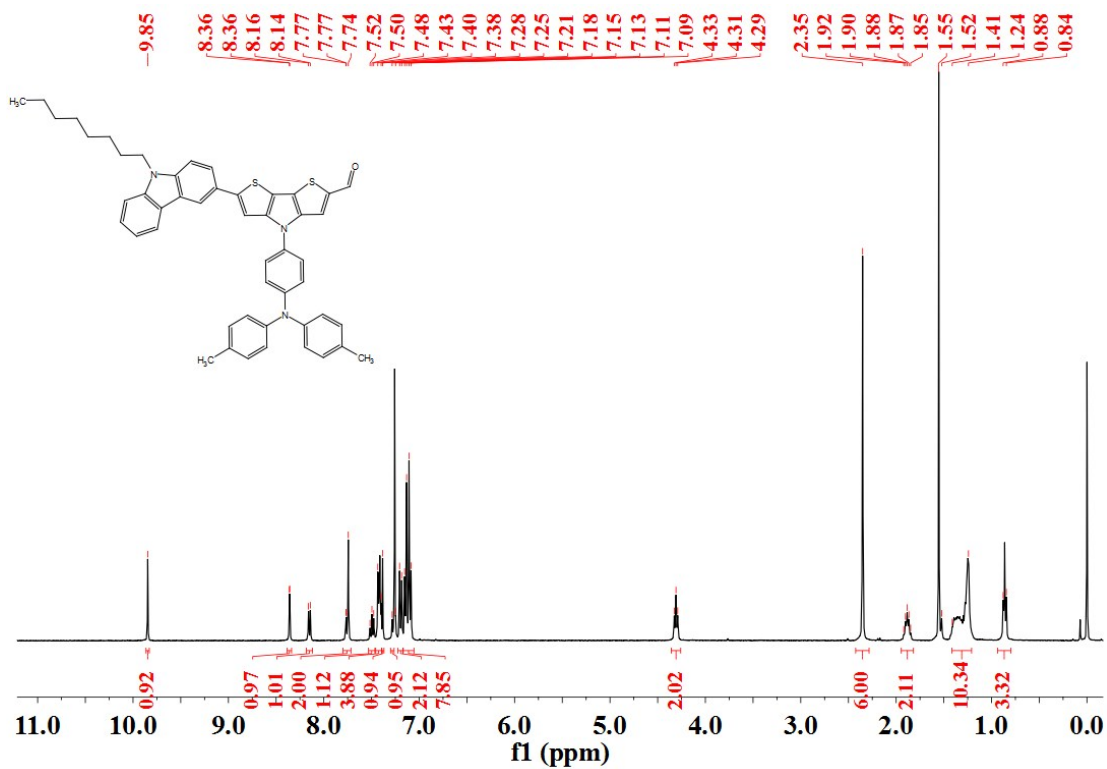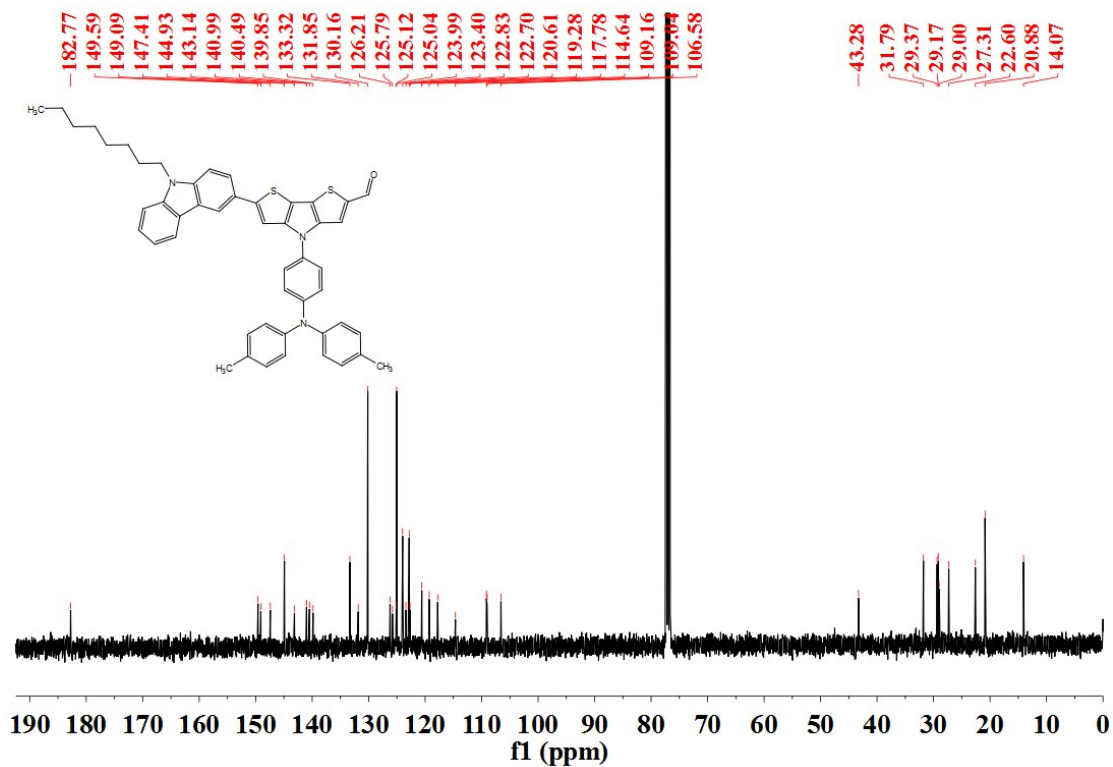

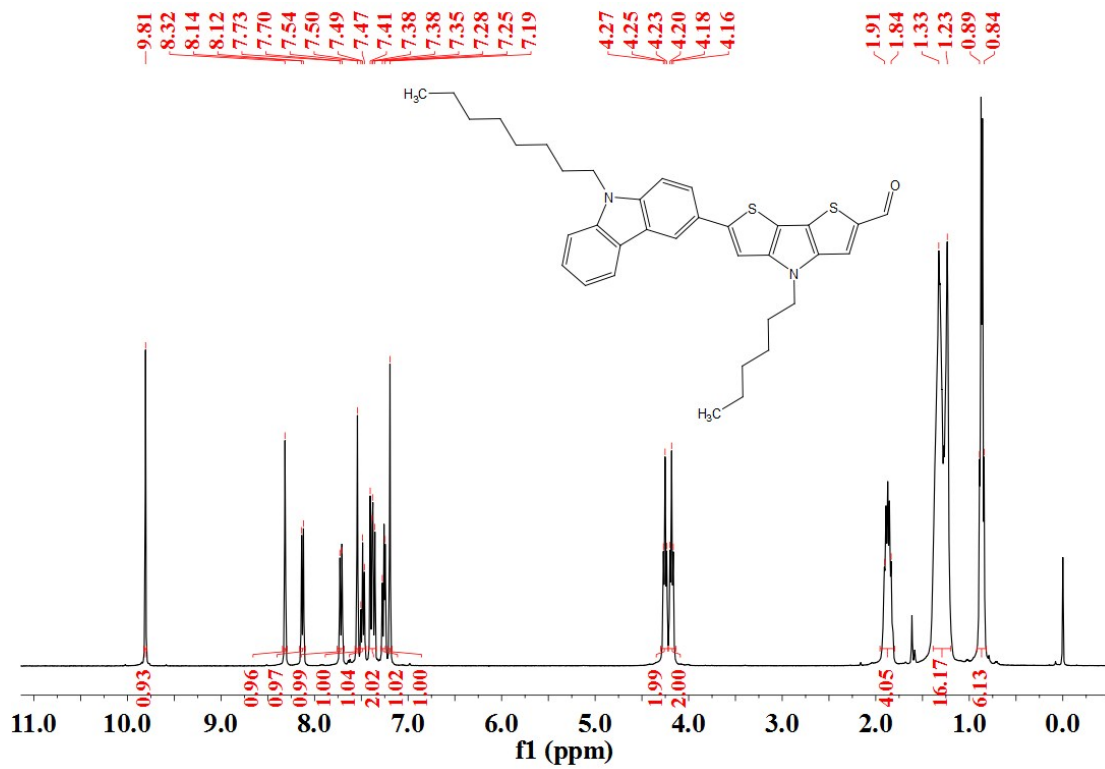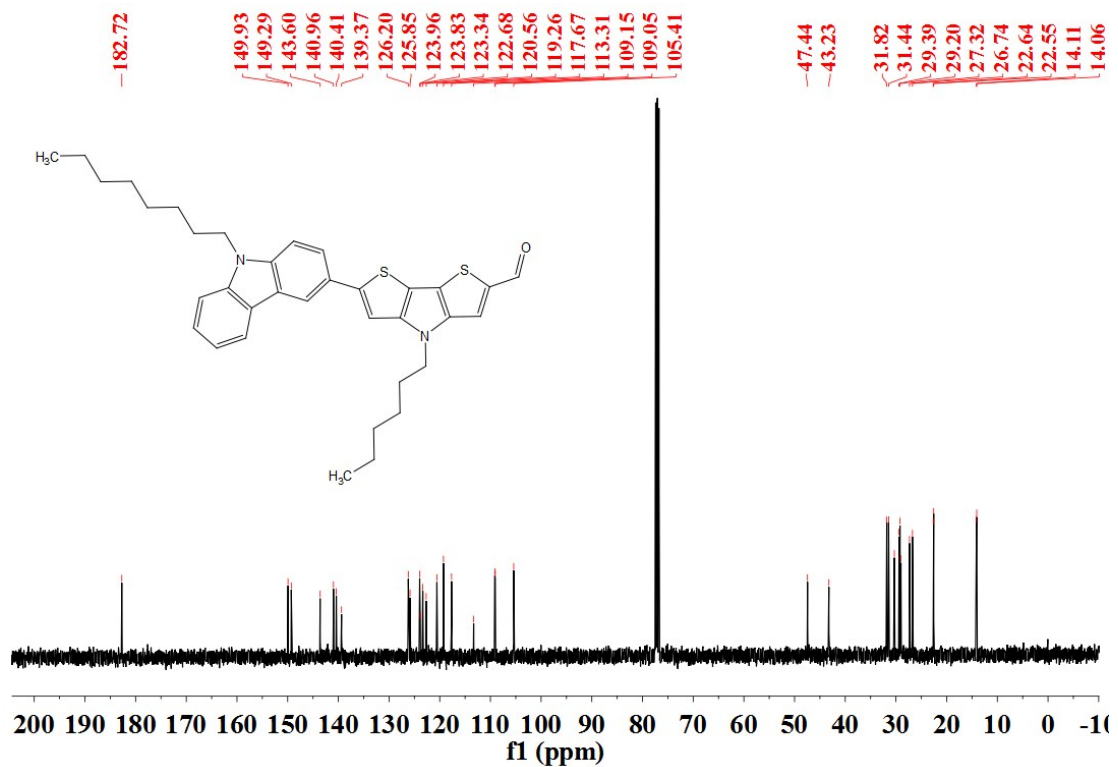

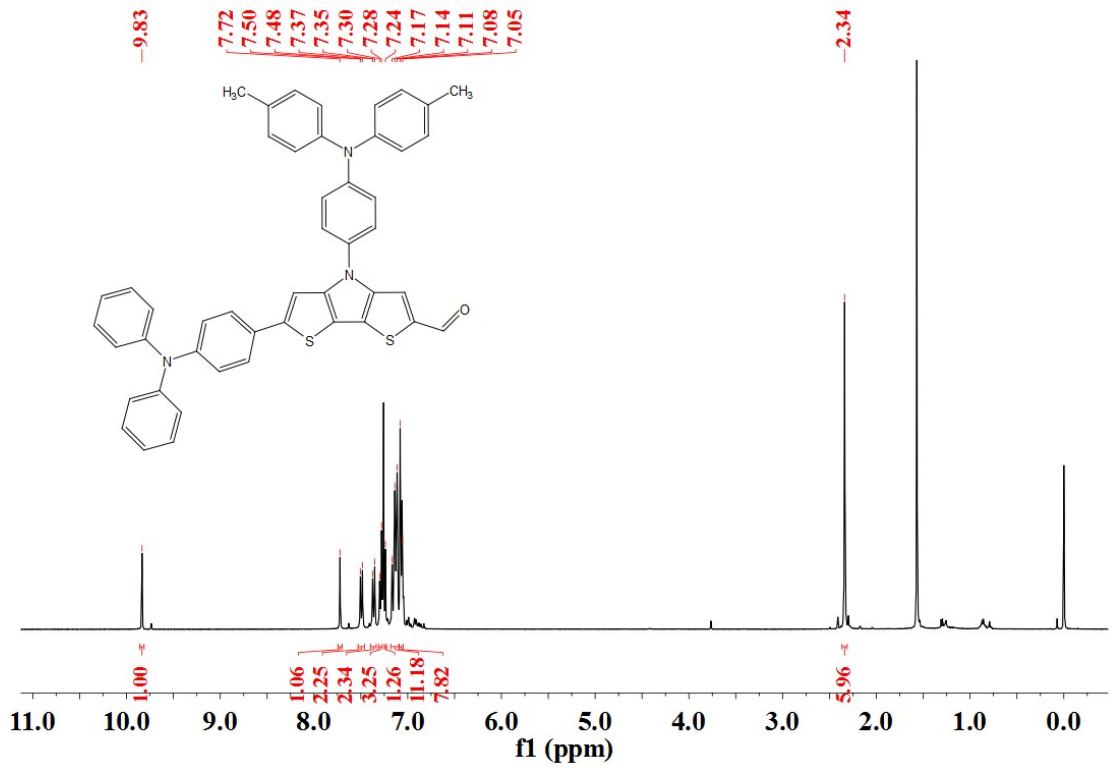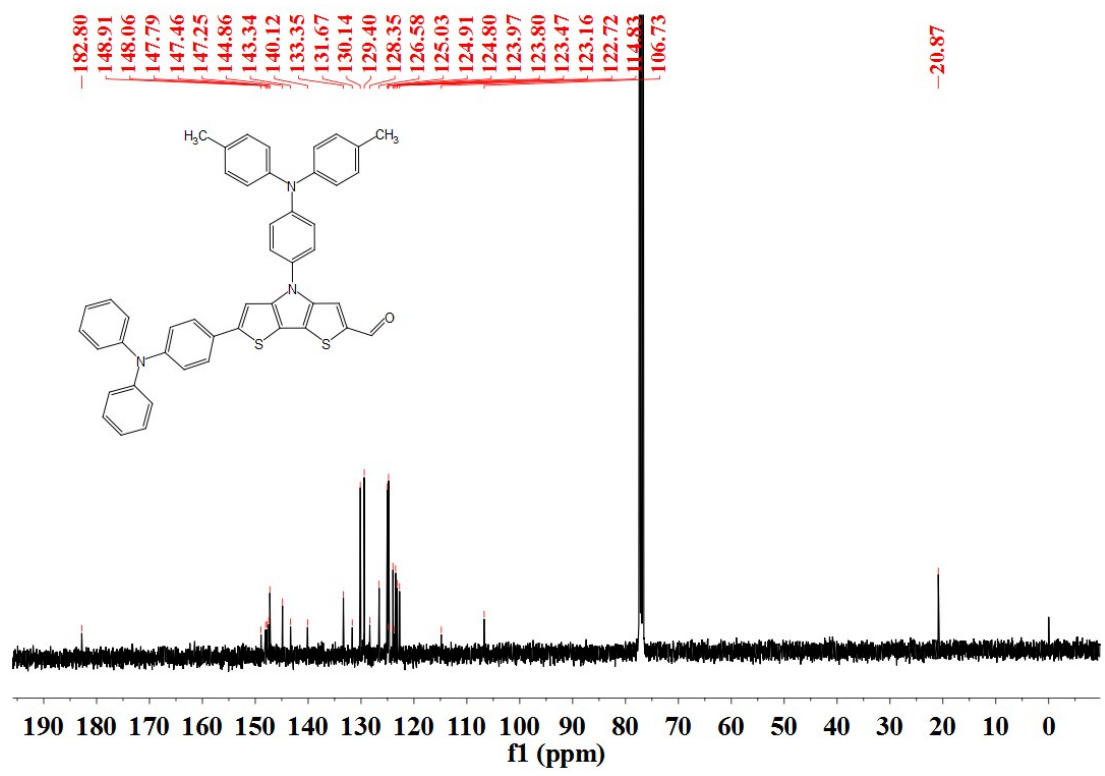

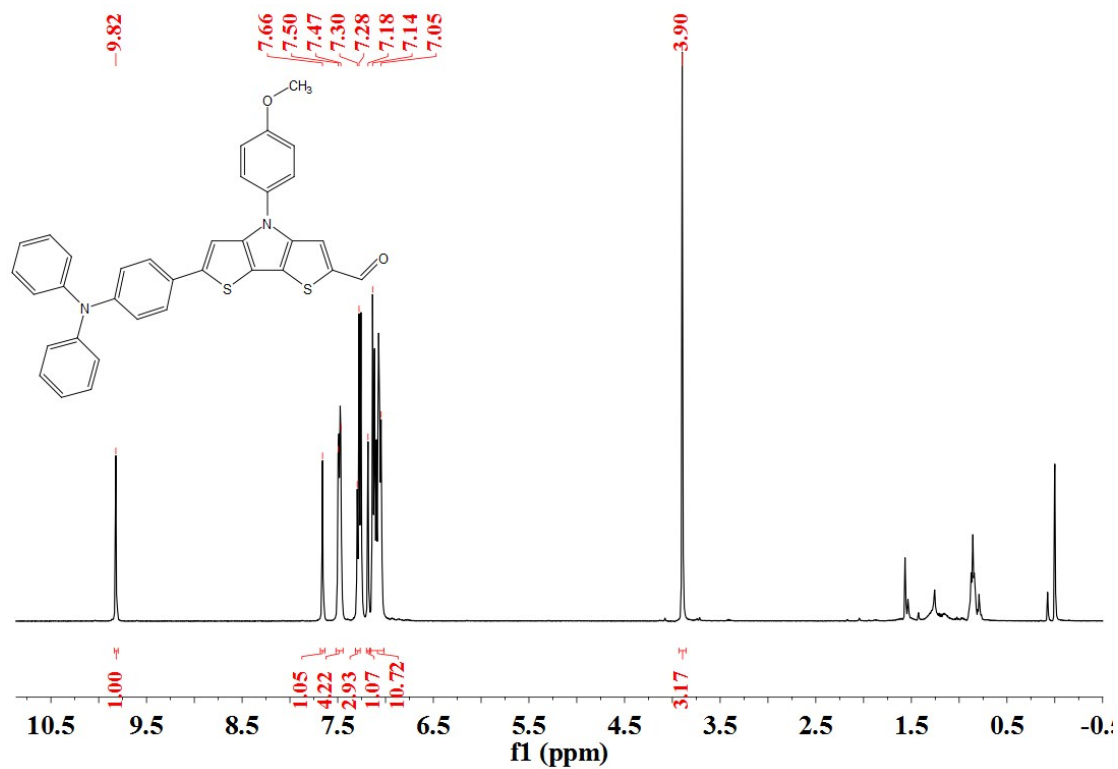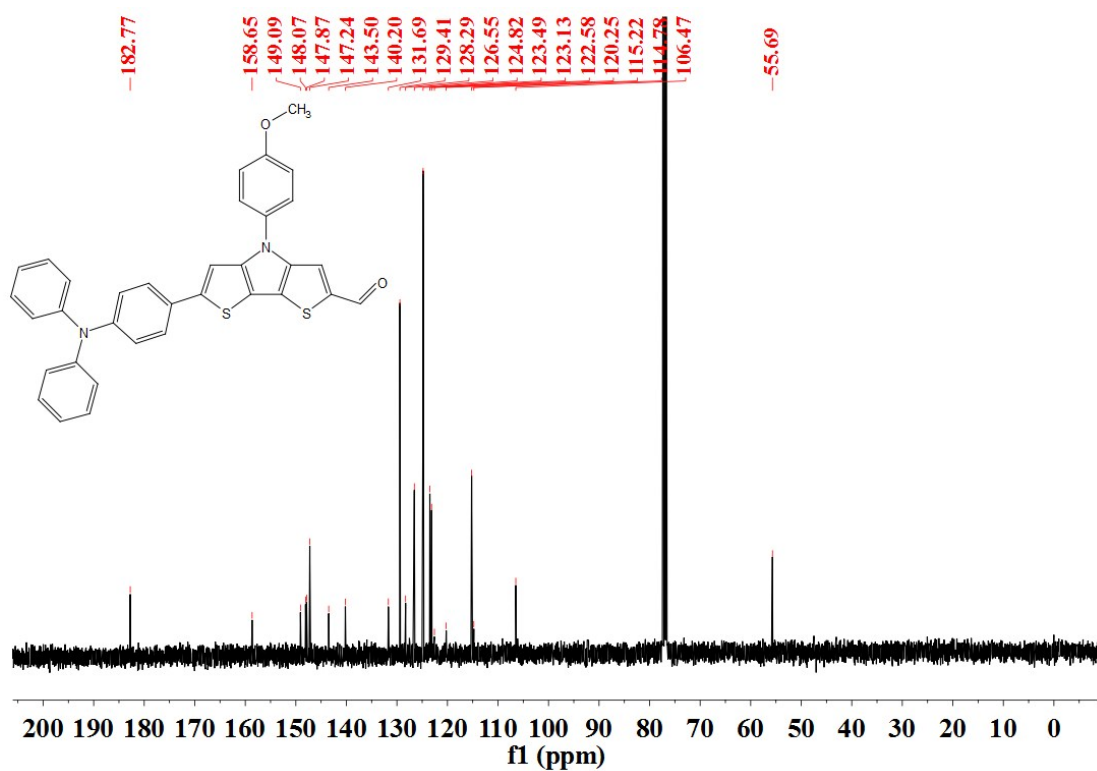

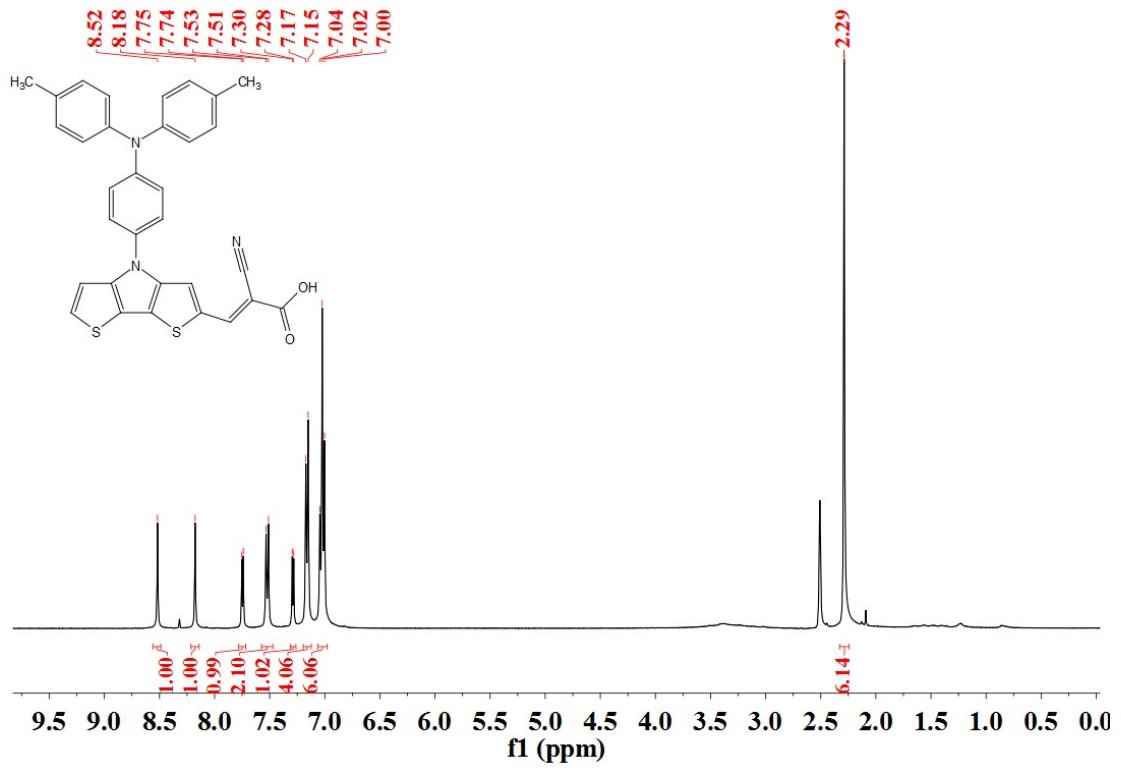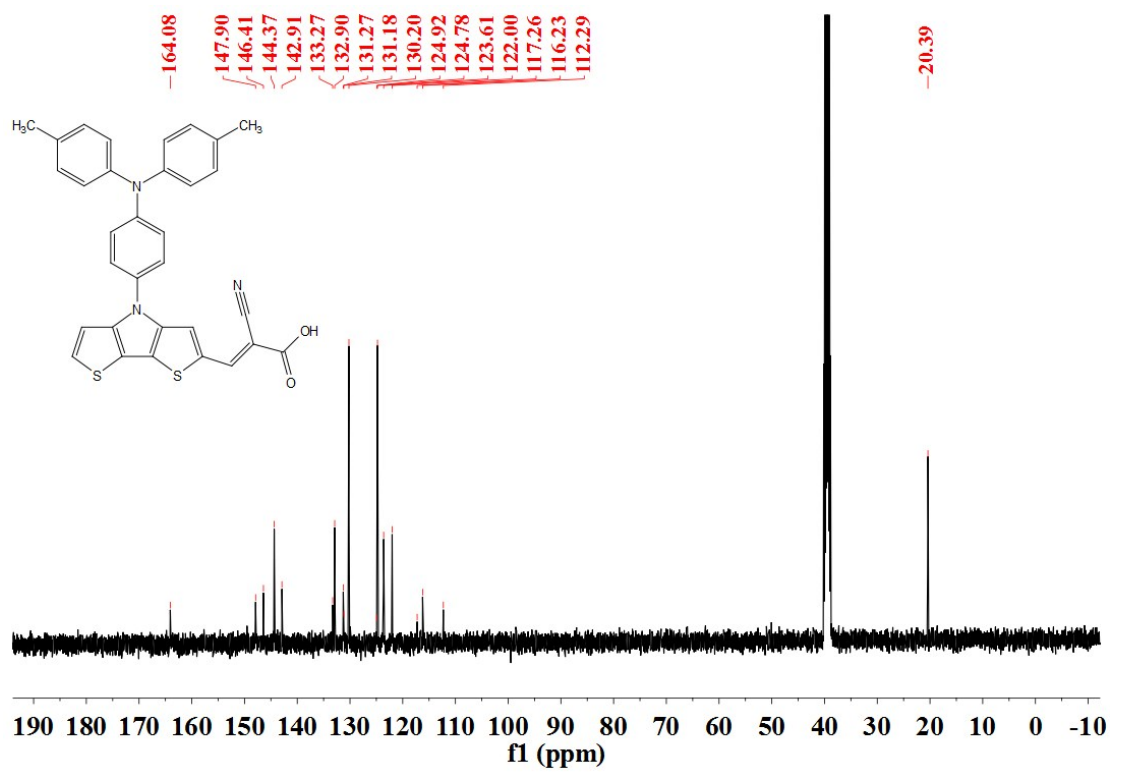

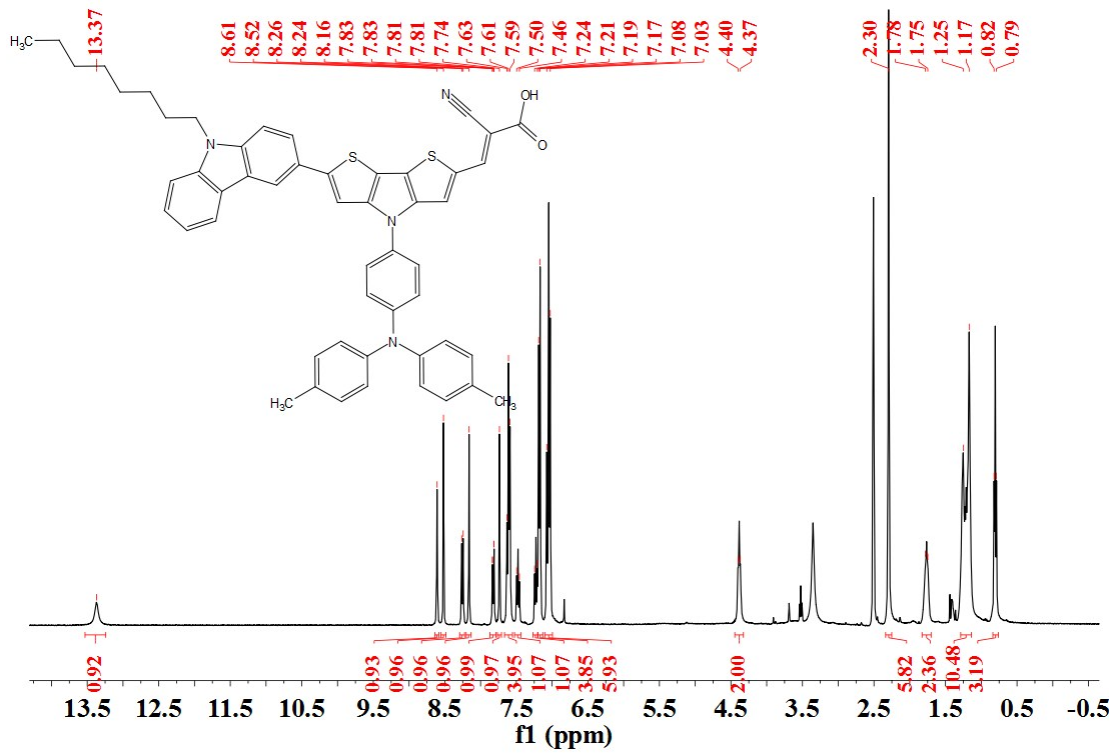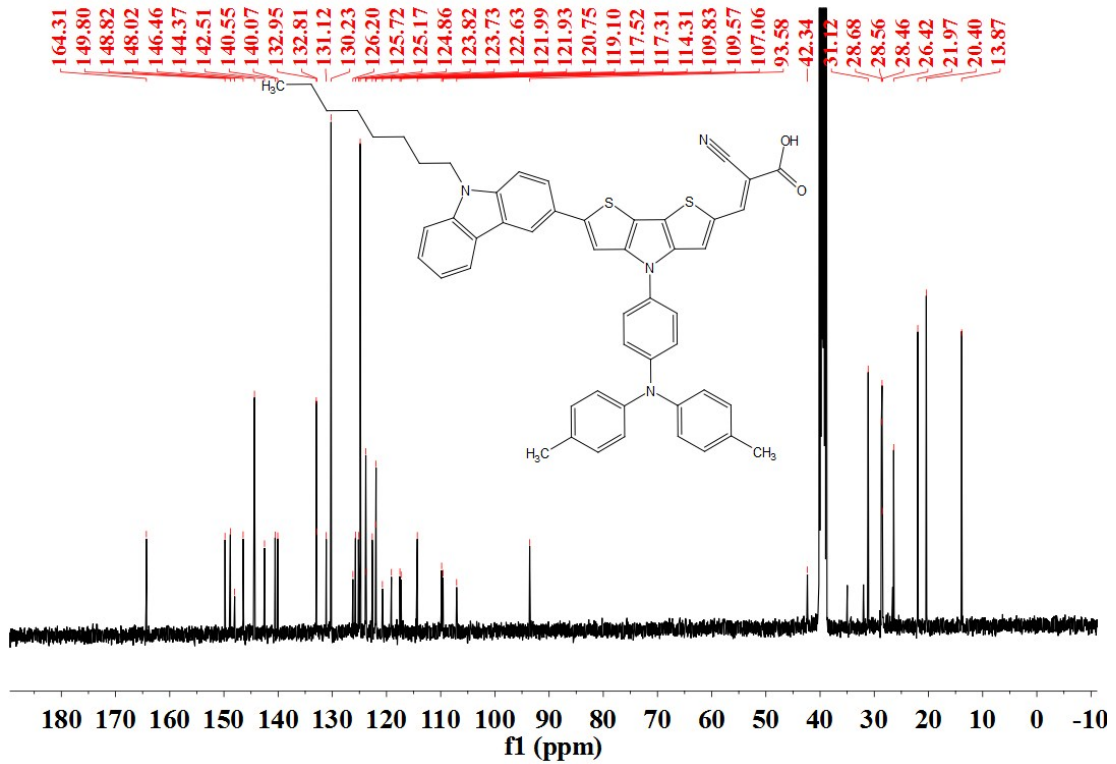

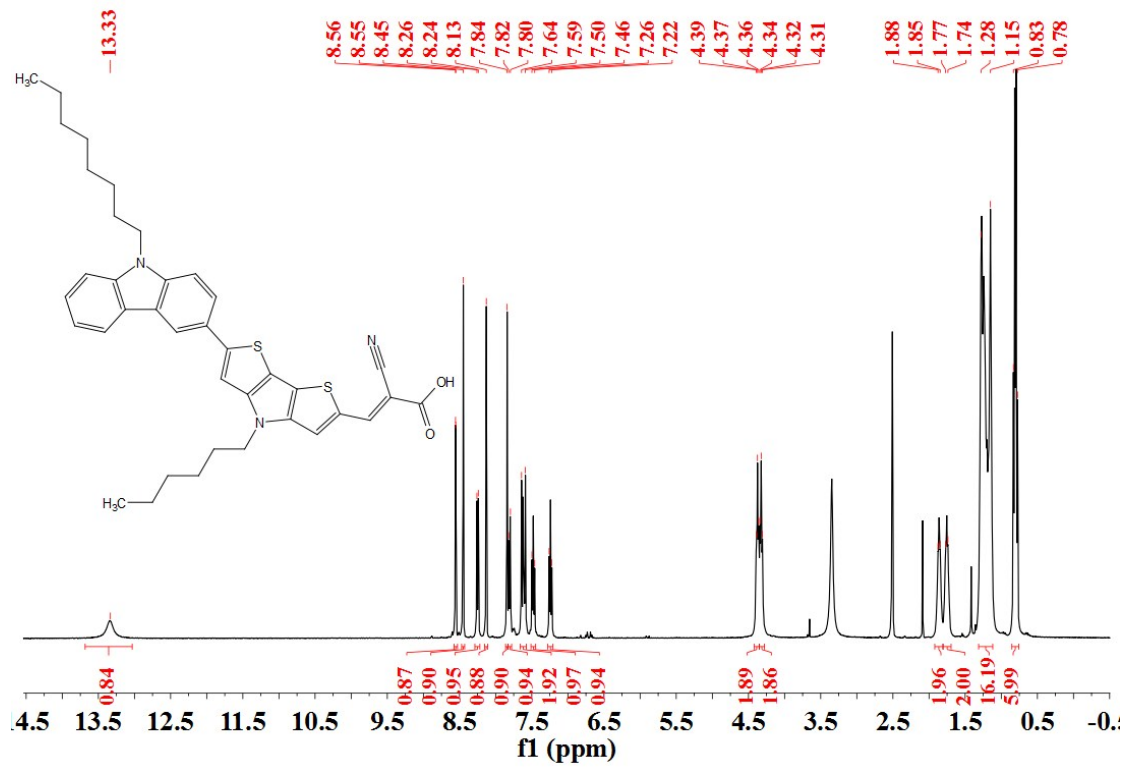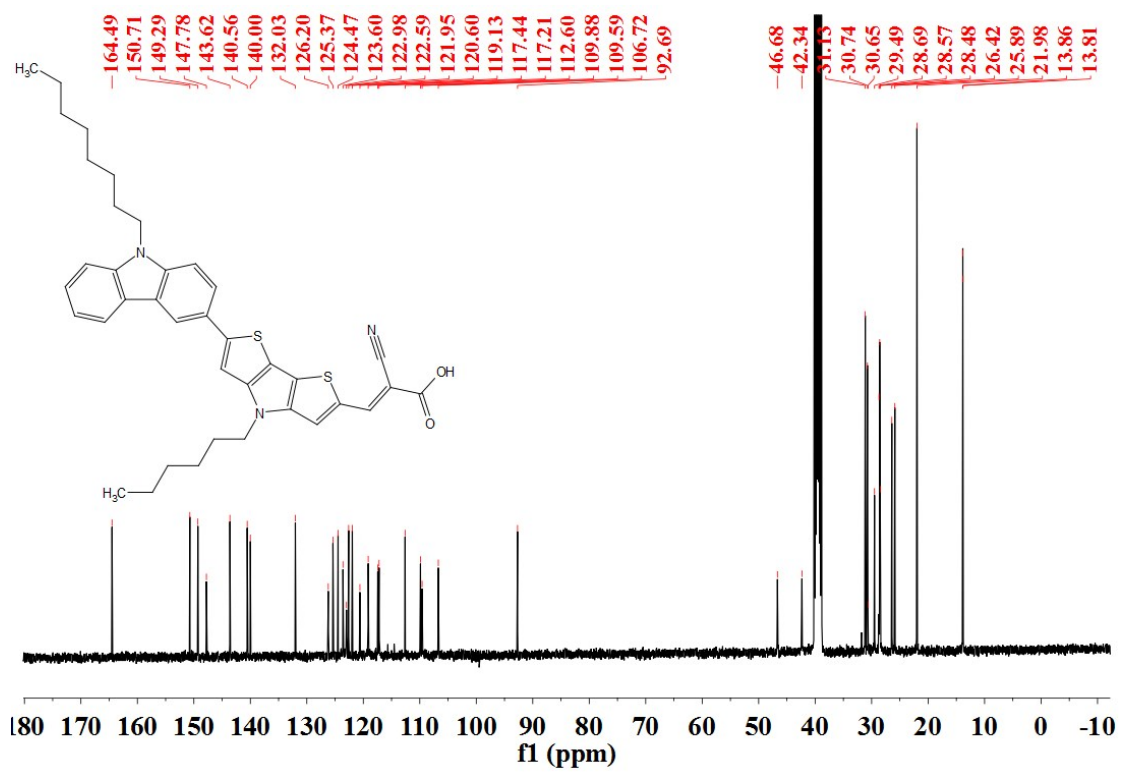



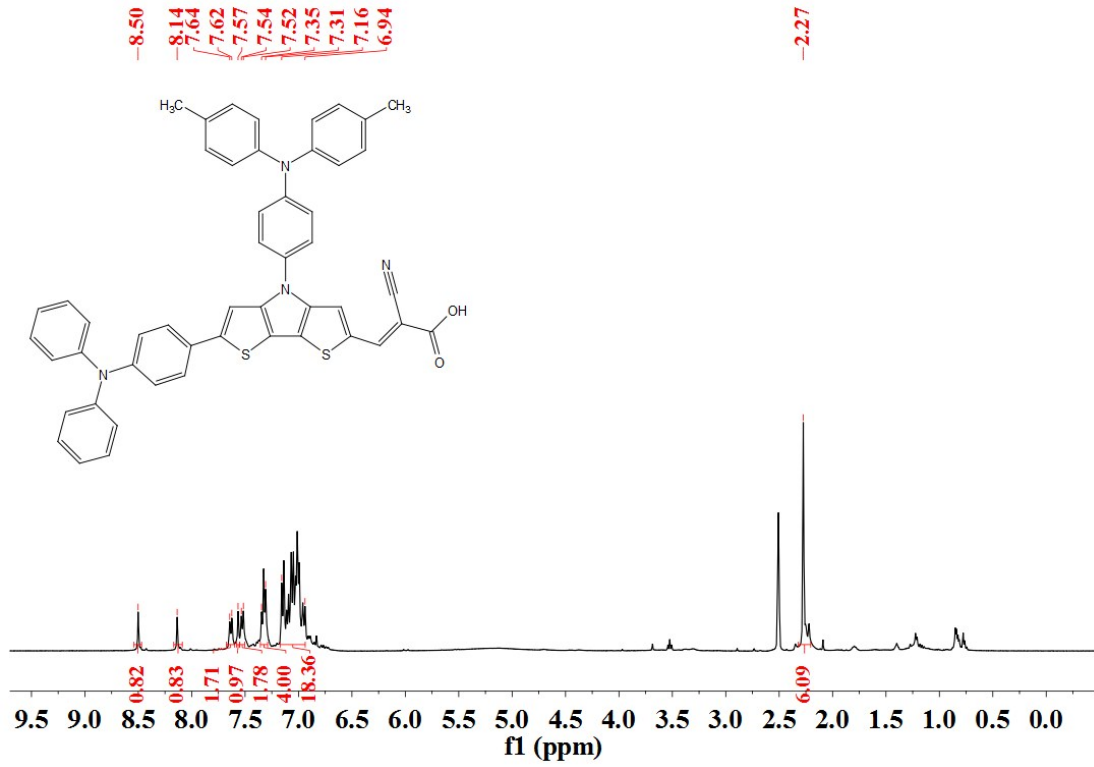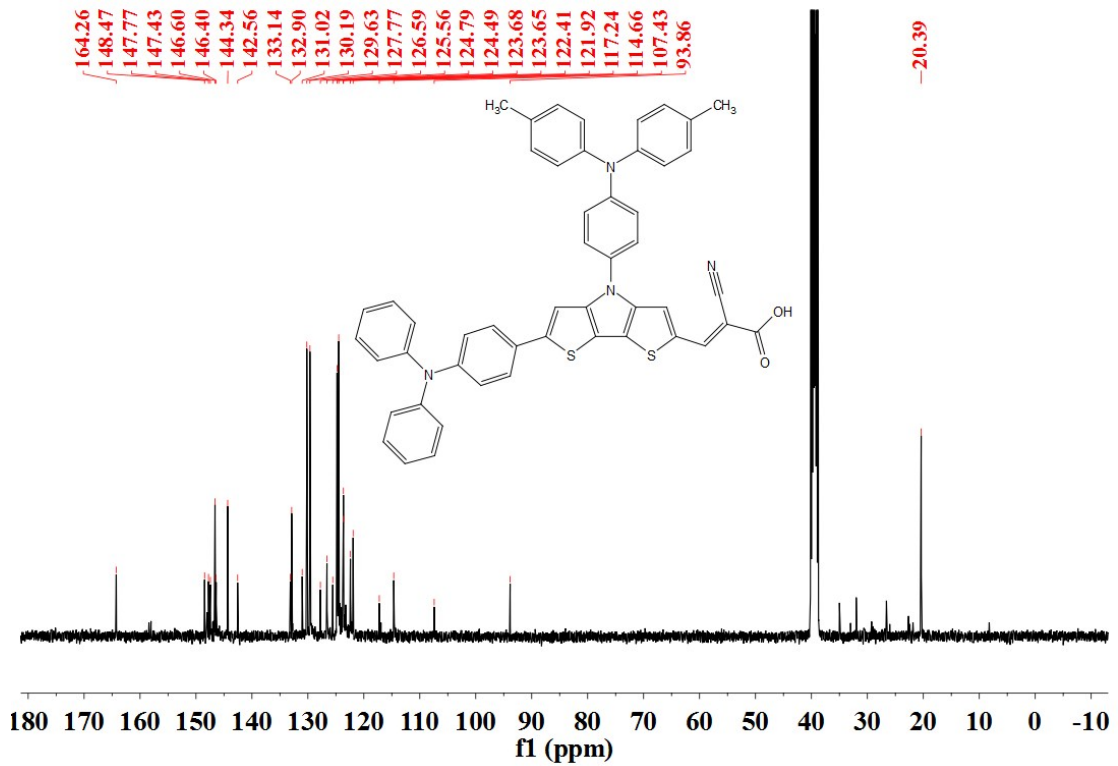

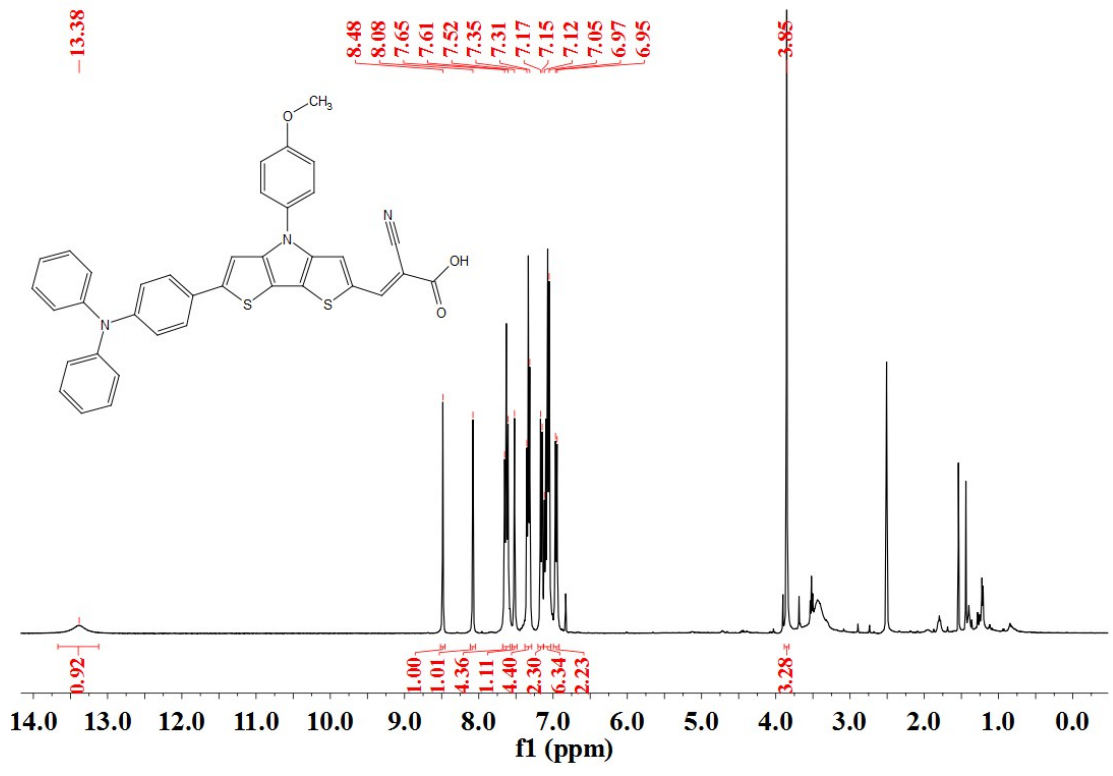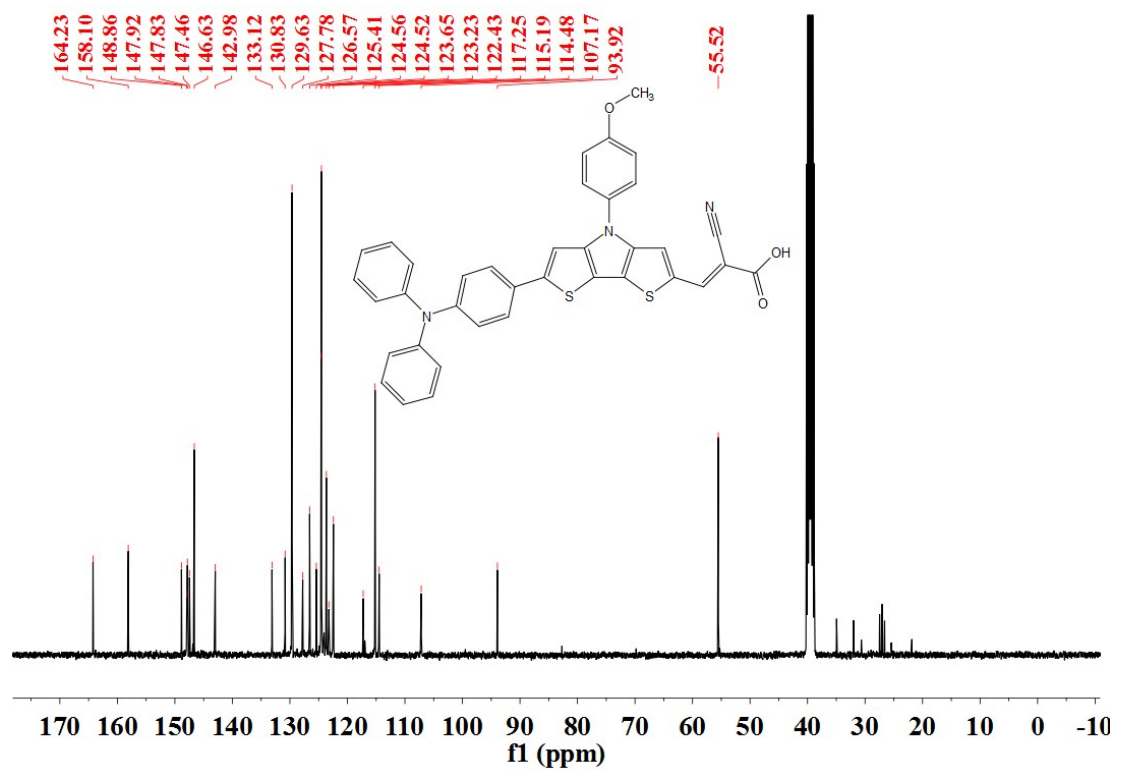

Supplement: c7ra05716d1.pdf [file c7ra05716d1.pdf]
